# Supplementary material
Source: publisher figshare collection journal article supplement (https://asha.figshare.com/articles/dataset/_/25583361)
Supplement: Supplementary file 2 [file 1]

## **Supplemental Material S1.** Parent and child focus group interview questions.

### Parents

1. When you think about the impact of microtia on your child's development and well-being, what do you see as the most important issue (and why)?
2. Has this always been the case, or has it changed over the years? If yes, in what way; why?
3. When your child was a baby, were you given enough information about their hearing loss, and how it might affect them?
4. When your child was a baby, were you given enough information about the range of possible treatment options for their hearing loss?
5. What made you decide to/not to go ahead with an intervention for the hearing loss?
- 5a. If you are still in the process of deciding, what would help you make that decision?
6. Do you think the hearing loss has had an impact on your child's progress at school? Or on their development in any other way?
7. What difference has the hearing device made to your child? In what way?
8. Looking back, would you make the same decision again regarding intervention for the hearing loss?

### Children

1. Do you think your deafness in one ear affects how you cope at home or at school? In what way?
2. If you were old enough, were you involved in discussions about the treatment options to help with your hearing loss? What can you remember about them?
3. What information were you given about the different types of hearing aids?
4. What information were you given about coming into hospital to have your BAHA fitted, and by whom?
5. What do you think about your BAHA now? Has it helped? Are there any negative sides to it?
